# Supplementary material for: Partial decarboxylation of hafnium oxide clusters for high resolution lithographic applications
Source: Royal Society of Chemistry journal article supplement (doi:10.1039/d2tc02912j), 2022-01-01

## *Supporting Information*

# **Partial Decarboxylation of Hafnium Oxide Clusters for High Resolution Lithographic Applications**

Pin-Chia Liao<sup>a</sup>, Po-Hsiung Cheng,<sup>b</sup> Yu-Fang Tseng,<sup>a</sup> Ting-An Shih,<sup>a</sup> Ting-An Lin<sup>a</sup> ·

Tsi-Sheng Gau\*<sup>b,c</sup> Burn-Jeng Lin\*,<sup>b,c</sup> Po-Wen Chiu\*<sup>b,c</sup> and Jui-Hsiung Liu<sup>a\*</sup>

**KEYWORDS:** Hexameric Hf oxide clusters, partially decarboxylation, photoresist, EUV lithography, line/space/edge character.

<sup>a</sup>Frontier Research Center for Matter Science and Technology, Department of Chemistry,

<sup>b</sup>TSMC-NTHU Joint Research Center

<sup>c</sup>Department of Electric Engineering, National Tsing-Hua University, Hsinchu, Taiwan, ROC, email: rslu@mx.nthu.edu.tw

### **Content:**

|                                                                  |    |
|------------------------------------------------------------------|----|
| 1. Representative Synthetic procedures -----                     | 1  |
| 2. ESI-Mass and thermogravimetric analysis datas -----           | 5  |
| 3. SEM images E-beam lithography patterns -----                  | 7  |
| 4. SEM images EUV lithography patterns -----                     | 9  |
| 5. X-ray crystallographic structures and data -----              | 13 |
| 6. Spectral data of key compounds -----                          | 15 |
| 7. <sup>1</sup> H and <sup>13</sup> C NMR of key compounds ----- | 17 |

## 1. Representative synthetic procedures

Unless otherwise noted, all reactions were carried out under nitrogen atmosphere in oven-dried glassware using standard syringe, cannula and septa apparatus. Dichloromethane and toluene were dried over CaH<sub>2</sub> and distilled. Reagents were purchased from commercial sources and used without purification, unless otherwise stated. <sup>1</sup>H NMR and <sup>13</sup>C NMR spectra were recorded on a Bruker 400 MHz and Bruker 500 MHz spectrometers using chloroform-d (CDCl<sub>3</sub>) as the internal standard. The ESI-Mass were performed using JEOL JMS-700. The EA analysis was performed by elemental vario EL cube. The TGA were performed using Mettler-Toledo 2-HT. FTIR Spectroscopy of powder samples was in a Bruker Vertex 80v spectrometer. The AFM measurements were using SEIKO SPA-300HV. Electron-beam lithography was done by utilizing Elionix ELS-7800 with an accelerating voltage of 80 kV and a beam current of 200 pA. The EUV-IL system at the Swiss Light Sources (SLS), Paul Scherrer Institute, utilizes 13.5 nm EUV light. HRXPS measurements were performed in a ULVAC-PHI Quantera II, with a monochromatic Al Ka source (energy of 1486.7 eV).

## 2. ESI-Mass, TGA data and AFM of species 1-OH

We attempted to confirm the structure of partially decarboxylated sample **1-OH** with ESI-mass to confirm the formula Hf<sub>6</sub>O<sub>4</sub>(OH)<sub>6</sub>(*i*-C<sub>4</sub>H<sub>9</sub>CO<sub>2</sub>)<sub>10</sub>. We observed clusters of peaks due to six hafnium isotopes together with [M+H]<sup>+</sup> and [M+2H]<sup>+2</sup>. We selected two major Hf isotopes <sup>178</sup>Hf (27%) and <sup>180</sup>Hf (35%), we were able to find seven fragments corresponding to [M+H]<sup>+</sup> which the exact mass between calculated and experimental data are well matched; see Figure S1. These are additional peaks that might be due to additional fragments of other Hf isotopes or different [M+nH]<sup>+n</sup> as 6-Hf clusters sometimes bear two or more protons because of the large sizes and more basic sites such as Hf-OH.

Apart from the fragments of [M+H]<sup>+</sup>, and we are also able to find seven fragments corresponding to [M+Na]<sup>+</sup>; the exact mass are calculated by two main Hf isotopes <sup>178</sup>Hf (27%) and <sup>180</sup>Hf (35%). As shown in Figure S-2, the calculated and the experimental values are well compatible. Additional peaks in Figure S2 is probably due to fragments of other Hf isotopes, or to different [M+Na+H]<sup>+2</sup> as 6-Hf clusters sometimes bear two or more protons because of the large sizes and more basic sites such as Hf-OH.

Data:2PC028 LiOH MeOH  
 Comment:  
 Description:  
 Ionization Mode:ESI+  
 History:Average(MS[1] 0.18..0.50)

Acquired:5/18/2022 12:01:52 PM  
 Operator:AccuTOF  
 m/z Calibration File:20220518 TFANA\_...  
 Created:6/8/2022 3:51:56 PM  
 Created by:AccuTOF

Charge number:1 Tolerance:300.00[ppm], 250.00 .. 250.... Unsaturation Number:-100.0 .. 200.0 (...)  
 Element:<sup>12</sup>C:50 .. 50, <sup>1</sup>H:97 .. 97, <sup>178</sup>Hf:0 .. 6, <sup>180</sup>Hf:1 .. 6, <sup>23</sup>Na:0 .. 1, <sup>16</sup>O:30 .. 30

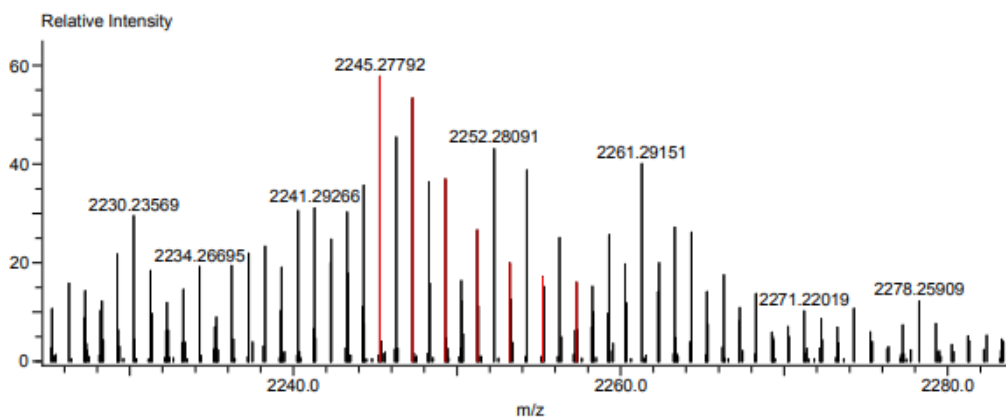

| Mass       | Intensity | Calc. Mass | Mass Difference [mDa] | Mass Difference [ppm] | Possible Formula                                                                                                                                       |
|------------|-----------|------------|-----------------------|-----------------------|--------------------------------------------------------------------------------------------------------------------------------------------------------|
| 2245.27792 | 2184.53   |            |                       |                       |                                                                                                                                                        |
| 2247.28242 | 2018.18   | 2247.27150 | 10.92                 | 4.86                  | <sup>12</sup> C <sub>50</sub> <sup>1</sup> H <sub>97</sub> <sup>178</sup> Hf <sub>5</sub> <sup>180</sup> Hf <sub>1</sub> <sup>16</sup> O <sub>30</sub> |
| 2249.29040 | 1396.37   | 2249.27435 | 16.05                 | 7.13                  | <sup>12</sup> C <sub>50</sub> <sup>1</sup> H <sub>97</sub> <sup>178</sup> Hf <sub>4</sub> <sup>180</sup> Hf <sub>2</sub> <sup>16</sup> O <sub>30</sub> |
| 2251.24141 | 1005.19   | 2251.27720 | -35.80                | -15.90                | <sup>12</sup> C <sub>50</sub> <sup>1</sup> H <sub>97</sub> <sup>178</sup> Hf <sub>3</sub> <sup>180</sup> Hf <sub>3</sub> <sup>16</sup> O <sub>30</sub> |
| 2253.22847 | 751.38    | 2253.28005 | -51.59                | -22.89                | <sup>12</sup> C <sub>50</sub> <sup>1</sup> H <sub>97</sub> <sup>178</sup> Hf <sub>2</sub> <sup>180</sup> Hf <sub>4</sub> <sup>16</sup> O <sub>30</sub> |
| 2255.24941 | 646.32    | 2255.28291 | -33.49                | -14.85                | <sup>12</sup> C <sub>50</sub> <sup>1</sup> H <sub>97</sub> <sup>178</sup> Hf <sub>1</sub> <sup>180</sup> Hf <sub>5</sub> <sup>16</sup> O <sub>30</sub> |
| 2257.31199 | 604.00    | 2257.28576 | 26.24                 | 11.62                 | <sup>12</sup> C <sub>50</sub> <sup>1</sup> H <sub>97</sub> <sup>180</sup> Hf <sub>6</sub> <sup>16</sup> O <sub>30</sub>                                |

Figure S1. ESI-Mass of species 1-OH [M+H]<sup>+</sup>.

Data:2PC028 LiOH MeOH  
 Comment:  
 Description:  
 Ionization Mode:ESI+  
 History:Average(MS[1] 0.18..0.50)

Acquired:5/18/2022 12:01:52 PM  
 Operator:AccuTOF  
 m/z Calibration File:20220518 TFA Na\_...  
 Created:6/8/2022 3:49:46 PM  
 Created by:AccuTOF

Charge number:1 Tolerance:300.00[ppm], 250.00 .. 250.... Unsaturation Number:-100.0 .. 200.0 (...  
 Element:<sup>12</sup>C:50 .. 50, <sup>1</sup>H:96 .. 96, <sup>178</sup>Hf:0 .. 6, <sup>180</sup>Hf:1 .. 6, <sup>23</sup>Na:1 .. 1, <sup>16</sup>O:30 .. 30

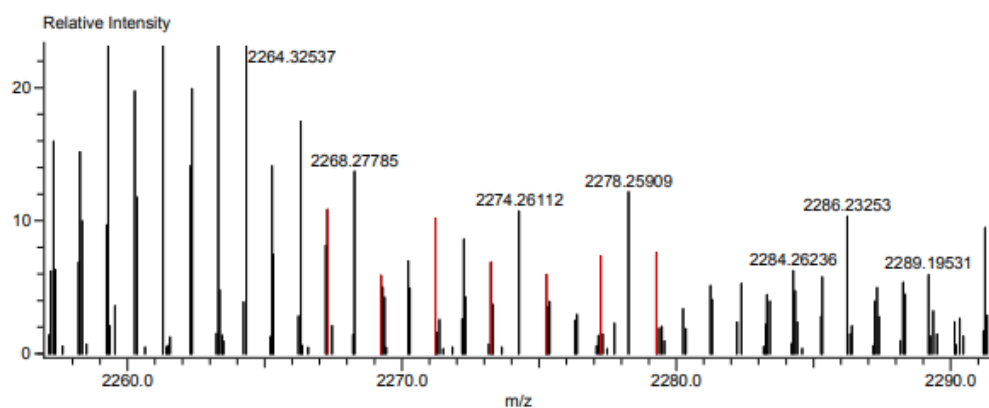

| Mass       | Intensity | Calc. Mass | Mass Difference [mDa] | Mass Difference [ppm] | Possible Formula                                                                                                                                                                     |
|------------|-----------|------------|-----------------------|-----------------------|--------------------------------------------------------------------------------------------------------------------------------------------------------------------------------------|
| 2267.28408 | 409.52    |            |                       |                       |                                                                                                                                                                                      |
| 2269.24046 | 221.47    | 2269.25345 | -12.99                | -5.72                 | <sup>12</sup> C <sub>50</sub> <sup>1</sup> H <sub>96</sub> <sup>178</sup> Hf <sub>5</sub> <sup>180</sup> Hf <sub>1</sub> <sup>23</sup> Na <sub>1</sub> <sup>16</sup> O <sub>30</sub> |
| 2271.22019 | 384.97    | 2271.25630 | -36.11                | -15.90                | <sup>12</sup> C <sub>50</sub> <sup>1</sup> H <sub>96</sub> <sup>178</sup> Hf <sub>4</sub> <sup>180</sup> Hf <sub>2</sub> <sup>23</sup> Na <sub>1</sub> <sup>16</sup> O <sub>30</sub> |
| 2273.25093 | 259.39    | 2273.25915 | -8.22                 | -3.62                 | <sup>12</sup> C <sub>50</sub> <sup>1</sup> H <sub>96</sub> <sup>178</sup> Hf <sub>3</sub> <sup>180</sup> Hf <sub>3</sub> <sup>23</sup> Na <sub>1</sub> <sup>16</sup> O <sub>30</sub> |
| 2275.25915 | 224.25    | 2275.26200 | -2.85                 | -1.25                 | <sup>12</sup> C <sub>50</sub> <sup>1</sup> H <sub>96</sub> <sup>178</sup> Hf <sub>2</sub> <sup>180</sup> Hf <sub>4</sub> <sup>23</sup> Na <sub>1</sub> <sup>16</sup> O <sub>30</sub> |
| 2277.24485 | 277.36    | 2277.26485 | -20.00                | -8.78                 | <sup>12</sup> C <sub>50</sub> <sup>1</sup> H <sub>96</sub> <sup>178</sup> Hf <sub>1</sub> <sup>180</sup> Hf <sub>5</sub> <sup>23</sup> Na <sub>1</sub> <sup>16</sup> O <sub>30</sub> |
| 2279.27785 | 287.47    | 2279.26770 | 10.15                 | 4.45                  | <sup>12</sup> C <sub>50</sub> <sup>1</sup> H <sub>96</sub> <sup>180</sup> Hf <sub>6</sub> <sup>23</sup> Na <sub>1</sub> <sup>16</sup> O <sub>30</sub>                                |

Figure S2. ESI-Mass of species 1-OH [M+Na]<sup>+</sup>.

We employed TGA to see their calibration with formula. In the case of acid-containing 1, we obtained residual weight ca. 50%; the theoretical value of HfO<sub>2</sub> formation is 46% based on the formula from the x-ray diffraction; the discrepancy is 4%. For partially decarboxylated **1-OH**, the residual weight is 58% whereas the theoretical value is found to be 56% based on our proposed formula Hf<sub>6</sub>O<sub>4</sub>(OH)<sub>6</sub>(*i*-C<sub>4</sub>H<sub>9</sub>CO<sub>2</sub>)<sub>10</sub>.

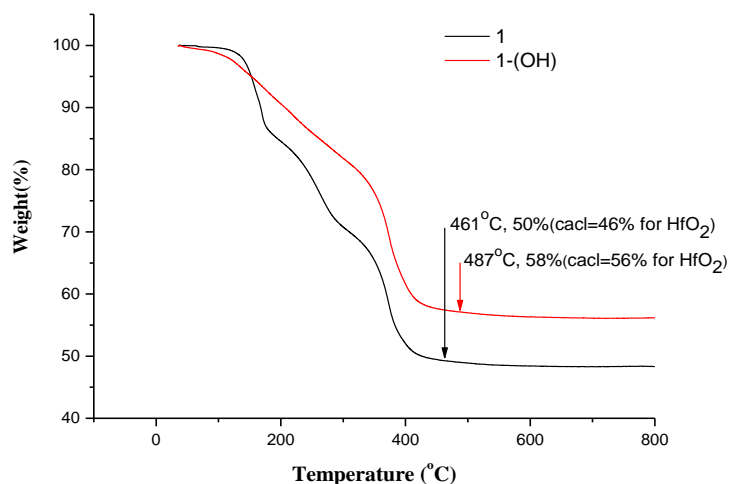

**Fig. S3.** TGA of species 1 and 1-OH

| Days | 1                                                                                                                  | 3                                                                                                                   | 7                                                                                                                    |
|------|--------------------------------------------------------------------------------------------------------------------|---------------------------------------------------------------------------------------------------------------------|----------------------------------------------------------------------------------------------------------------------|
| AFM  | 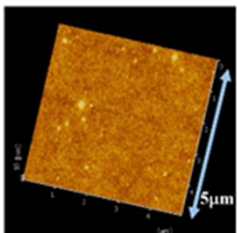 <p>RMS roughness = 0.85 nm</p> |  <p>RMS roughness = 0.74 nm</p> |  <p>RMS roughness = 1.06 nm</p> |

**Fig. S4.** AFM of species **1-OH** at different days after soft backing

## 2. ESI-Mass and TGA data of species 2-OH

Data:2PC023 LiOH ACN

Comment:

Description:

Ionization Mode:ESI+

History:Average(MS[1] 0.20..0.29)

Acquired:5/18/2022 12:30:41 PM

Operator:AccuTOF

m/z Calibration File:20220518 TFA Na\_...

Created:6/7/2022 4:50:48 PM

Created by:

Charge number:1

Tolerance:300.00[ppm], 250.00 .. 250....

Unsaturation Number:-100.0 .. 200.0 (...)

Element:<sup>12</sup>C:46 .. 46, <sup>1</sup>H:89 .. 89, <sup>178</sup>Hf:0 .. 6, <sup>180</sup>Hf:1 .. 6, <sup>23</sup>Na:0 .. 1, <sup>16</sup>O:30 .. 30

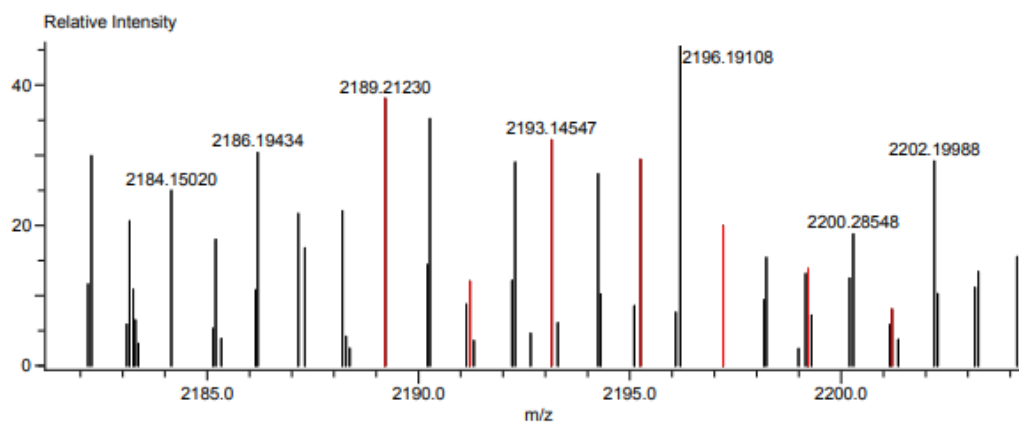

| Mass       | Intensity | Calc. Mass | Mass Difference [mDa] | Mass Difference [ppm] | Possible Formula                                                                                                                                       |
|------------|-----------|------------|-----------------------|-----------------------|--------------------------------------------------------------------------------------------------------------------------------------------------------|
| 2189.21230 | 1020.22   |            |                       |                       |                                                                                                                                                        |
| 2191.21754 | 322.37    | 2191.20890 | 8.64                  | 3.94                  | <sup>12</sup> C <sub>46</sub> <sup>1</sup> H <sub>89</sub> <sup>178</sup> Hf <sub>5</sub> <sup>180</sup> Hf <sub>1</sub> <sup>16</sup> O <sub>30</sub> |
| 2193.14547 | 862.15    | 2193.21175 | -66.29                | -30.22                | <sup>12</sup> C <sub>46</sub> <sup>1</sup> H <sub>89</sub> <sup>178</sup> Hf <sub>4</sub> <sup>180</sup> Hf <sub>2</sub> <sup>16</sup> O <sub>30</sub> |
| 2195.24768 | 787.31    | 2195.21460 | 33.08                 | 15.07                 | <sup>12</sup> C <sub>46</sub> <sup>1</sup> H <sub>89</sub> <sup>178</sup> Hf <sub>3</sub> <sup>180</sup> Hf <sub>3</sub> <sup>16</sup> O <sub>30</sub> |
| 2197.21042 | 533.32    | 2197.21745 | -7.03                 | -3.20                 | <sup>12</sup> C <sub>46</sub> <sup>1</sup> H <sub>89</sub> <sup>178</sup> Hf <sub>2</sub> <sup>180</sup> Hf <sub>4</sub> <sup>16</sup> O <sub>30</sub> |
| 2199.22067 | 369.45    | 2199.22031 | 0.37                  | 0.17                  | <sup>12</sup> C <sub>46</sub> <sup>1</sup> H <sub>89</sub> <sup>178</sup> Hf <sub>1</sub> <sup>180</sup> Hf <sub>5</sub> <sup>16</sup> O <sub>30</sub> |
| 2201.20209 | 215.29    | 2201.22316 | -21.07                | -9.57                 | <sup>12</sup> C <sub>46</sub> <sup>1</sup> H <sub>89</sub> <sup>180</sup> Hf <sub>6</sub> <sup>16</sup> O <sub>30</sub>                                |

Figure S5. ESI-Mass of species 2-OH [M+H]<sup>+</sup>.

Data:2PC023 LIOH ACN  
 Comment:  
 Description:  
 Ionization Mode:ESI+  
 History:Average(MS[1] 0.20..0.29)

Acquired:5/18/2022 12:30:41 PM  
 Operator:AccuTOF  
 m/z Calibration File:20220518 TFANa\_...  
 Created:6/7/2022 4:53:31 PM  
 Created by:

Charge number:1 Tolerance:300.00[ppm], 250.00 .. 250.... Unsaturation Number:-100.0 .. 200.0 (...)  
 Element:<sup>12</sup>C:46 .. 46, <sup>1</sup>H:88 .. 88, <sup>178</sup>Hf:0 .. 6, <sup>180</sup>Hf:1 .. 6, <sup>23</sup>Na:1 .. 1, <sup>16</sup>O:30 .. 30

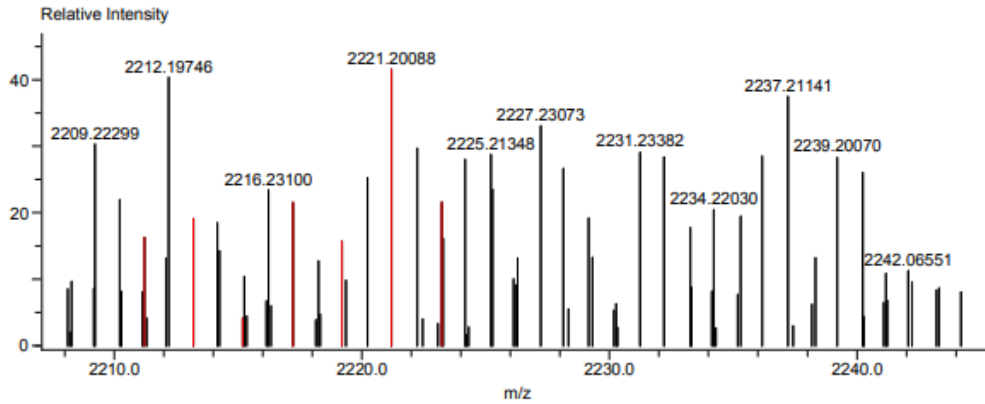

| Mass       | Intensity | Calc. Mass | Mass Difference [mDa] | Mass Difference [ppm] | Possible Formula                                                                                                                                                                     |
|------------|-----------|------------|-----------------------|-----------------------|--------------------------------------------------------------------------------------------------------------------------------------------------------------------------------------|
| 2211.22533 | 435.21    |            |                       |                       |                                                                                                                                                                                      |
| 2213.19557 | 510.75    | 2213.19085 | 4.72                  | 2.13                  | <sup>12</sup> C <sub>46</sub> <sup>1</sup> H <sub>88</sub> <sup>178</sup> Hf <sub>5</sub> <sup>180</sup> Hf <sub>1</sub> <sup>23</sup> Na <sub>1</sub> <sup>16</sup> O <sub>30</sub> |
| 2215.18849 | 108.95    | 2215.19370 | -5.21                 | -2.35                 | <sup>12</sup> C <sub>46</sub> <sup>1</sup> H <sub>88</sub> <sup>178</sup> Hf <sub>4</sub> <sup>180</sup> Hf <sub>2</sub> <sup>23</sup> Na <sub>1</sub> <sup>16</sup> O <sub>30</sub> |
| 2217.21910 | 575.67    | 2217.19655 | 22.56                 | 10.17                 | <sup>12</sup> C <sub>46</sub> <sup>1</sup> H <sub>88</sub> <sup>178</sup> Hf <sub>3</sub> <sup>180</sup> Hf <sub>3</sub> <sup>23</sup> Na <sub>1</sub> <sup>16</sup> O <sub>30</sub> |
| 2219.19506 | 419.93    | 2219.19940 | -4.33                 | -1.95                 | <sup>12</sup> C <sub>46</sub> <sup>1</sup> H <sub>88</sub> <sup>178</sup> Hf <sub>2</sub> <sup>180</sup> Hf <sub>4</sub> <sup>23</sup> Na <sub>1</sub> <sup>16</sup> O <sub>30</sub> |
| 2221.20088 | 1113.12   | 2221.20225 | -1.37                 | -0.62                 | <sup>12</sup> C <sub>46</sub> <sup>1</sup> H <sub>88</sub> <sup>178</sup> Hf <sub>1</sub> <sup>180</sup> Hf <sub>5</sub> <sup>23</sup> Na <sub>1</sub> <sup>16</sup> O <sub>30</sub> |
| 2223.23436 | 577.78    | 2223.20510 | 29.26                 | 13.16                 | <sup>12</sup> C <sub>46</sub> <sup>1</sup> H <sub>88</sub> <sup>180</sup> Hf <sub>6</sub> <sup>23</sup> Na <sub>1</sub> <sup>16</sup> O <sub>30</sub>                                |

Figure S6. ESI-Mass of species 2-OH [M+Na]<sup>+</sup>.

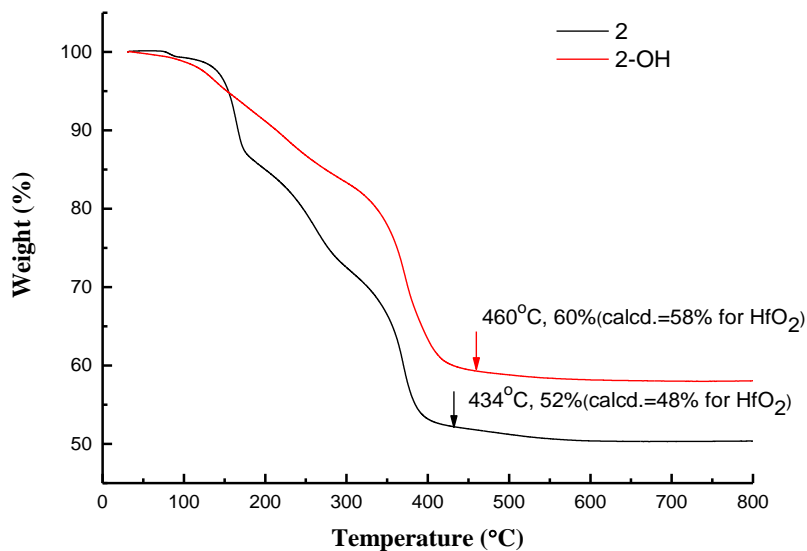

Figure S7. TGA of species 2 and 2-OH.

### 3. SEM image of E-beam lithography patterns

| Design HP<br>Dose              | Design HP=50 nm                                                                                 | Design HP=40 nm                                                                                 | Design HP=30 nm                                                                                  | Design HP=20 nm                                                                                   |
|--------------------------------|-------------------------------------------------------------------------------------------------|-------------------------------------------------------------------------------------------------|--------------------------------------------------------------------------------------------------|---------------------------------------------------------------------------------------------------|
| 1440 $\mu\text{C}/\text{cm}^2$ | HP = 53 nm<br>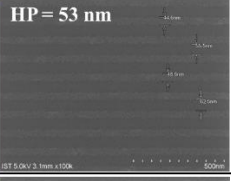 | HP = 40 nm<br> | HP = 33 nm<br> |                |
| 1760 $\mu\text{C}/\text{cm}^2$ | HP = 50 nm<br> | HP = 42 nm<br> | HP = 31 nm<br> | HP = 23 nm<br> |
| 2080 $\mu\text{C}/\text{cm}^2$ | HP = 51 nm<br> | HP = 39 nm<br> | HP = 31 nm<br> | HP = 24 nm<br> |

**Figure S8.** SEM images of E-beam lithography patterns on 1. Process parameter: 1.5 wt%, THK= 24 nm, Developer: 2-Heptanone : Hexane = 1 : 1 60 s, PEB= 80°C 60 s

| Design HP<br>Dose              | Design HP=50 nm                                                                                   | Design HP=40 nm                                                                                   | Design HP=30 nm                                                                                    | Design HP=20 nm                                                                       |
|--------------------------------|---------------------------------------------------------------------------------------------------|---------------------------------------------------------------------------------------------------|----------------------------------------------------------------------------------------------------|---------------------------------------------------------------------------------------|
| 1440 $\mu\text{C}/\text{cm}^2$ | HP = 49 nm<br>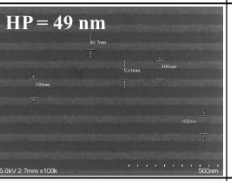 | HP = 40 nm<br> | HP = 31 nm<br> |  |
| 1760 $\mu\text{C}/\text{cm}^2$ | HP = 50 nm<br> | HP = 42 nm<br> | HP = 31 nm<br> |  |
| 2080 $\mu\text{C}/\text{cm}^2$ | HP = 48 nm<br> | HP = 41 nm<br> | HP = 30 nm<br> |  |

**Figure S9.** SEM images of E-beam lithography patterns on 1-(OH). Process parameter: 2.0 wt%, THK= 23 nm, Developer: 2-Heptanone : Hexane = 1 : 1 80 s, PEB= 80°C, 60s



| Design HP<br>Dose              | Design HP=50 nm                                                                                 | Design HP=40 nm                                                                                 | Design HP=30 nm                                                                                  | Design HP=20 nm                                                                                   |
|--------------------------------|-------------------------------------------------------------------------------------------------|-------------------------------------------------------------------------------------------------|--------------------------------------------------------------------------------------------------|---------------------------------------------------------------------------------------------------|
| 1440 $\mu\text{C}/\text{cm}^2$ | HP = 53 nm<br>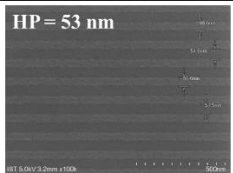 | HP = 42 nm<br> | HP = 31 nm<br> | HP = 22 nm<br> |
| 1760 $\mu\text{C}/\text{cm}^2$ | HP = 49 nm<br> | HP = 40 nm<br> | HP = 30 nm<br> |                |
| 2080 $\mu\text{C}/\text{cm}^2$ | HP = 48 nm<br> | HP = 42 nm<br> | HP = 30 nm<br> |                |

**Figure S10.** SEM images of E-beam lithography patterns on 2-(OH). Process parameter: 2.0 wt%, THK= 24 nm, Developer: 2-Heptanone : Hexane = 1 : 1 60 s, PEB= 80°C 60 s

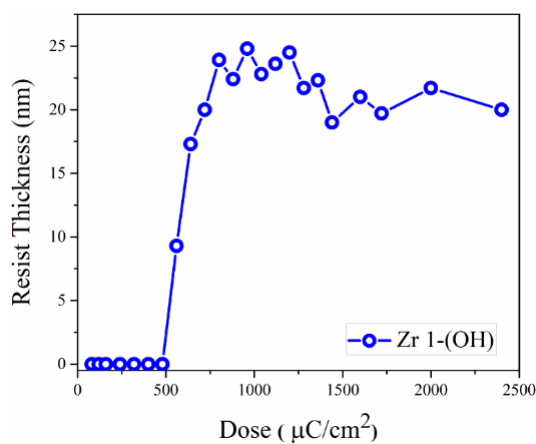

**Figure S11.** E-beam contrast curve of compound **Zr 1-(OH)** Initial thickness 30 nm..

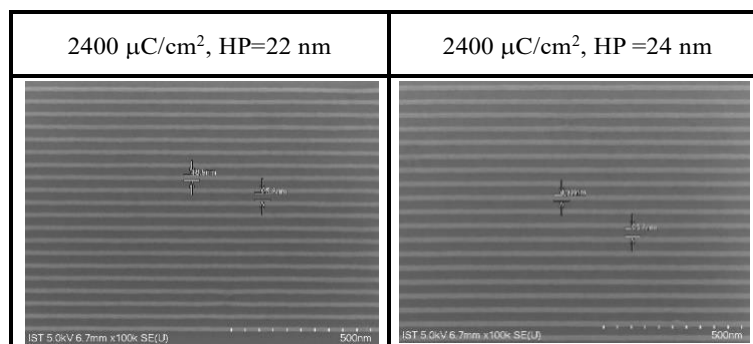

**Figure S12.** SEM images of E-beam lithography patterns on **Zr 1-(OH)**. Process parameter: 2.0 wt%, THK= 17 nm, Developer: 2-Heptanone : Hexane = 1 : 1 60 s, PEB= 80°C 60 s

#### 4. SEM image of EUV lithography patterns

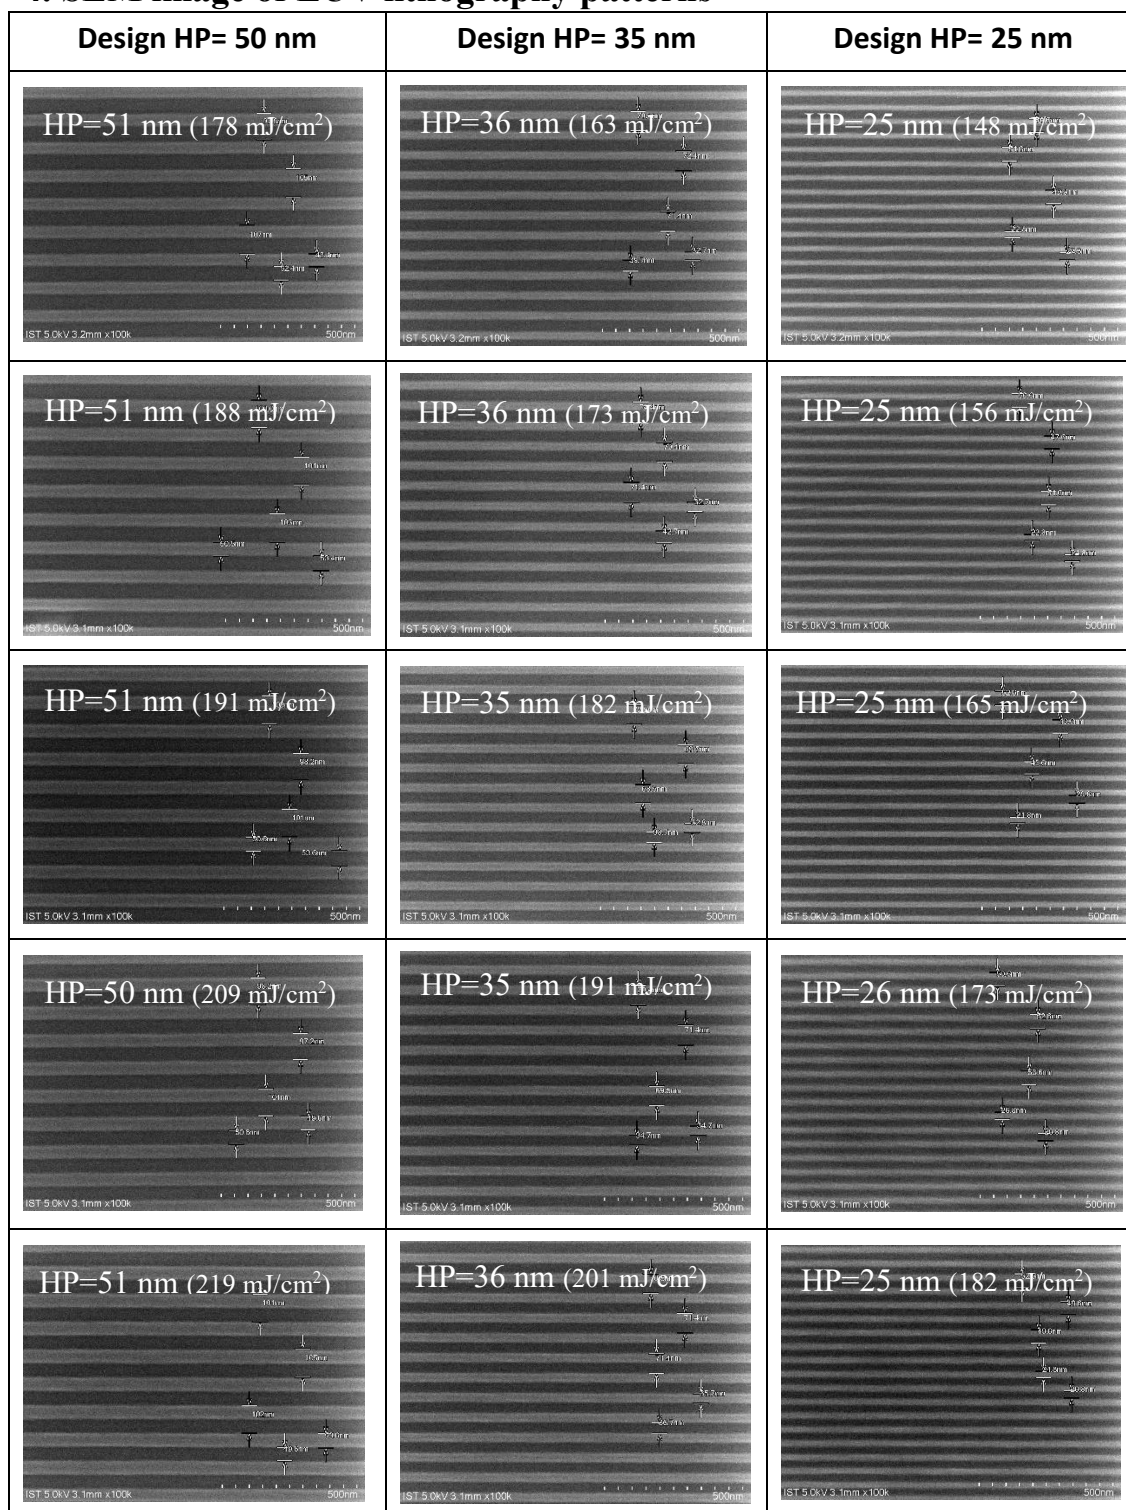

**Figure S13.** SEM images of EUV lithography patterns on 1-(OH) HP= 50, 35, 25 nm at different dose. Process parameter: 2.0 wt%, THK= 23 nm, Developer: 2-Heptanone : Hexane = 1 : 1 80 s, PEB= 80°C 60 s

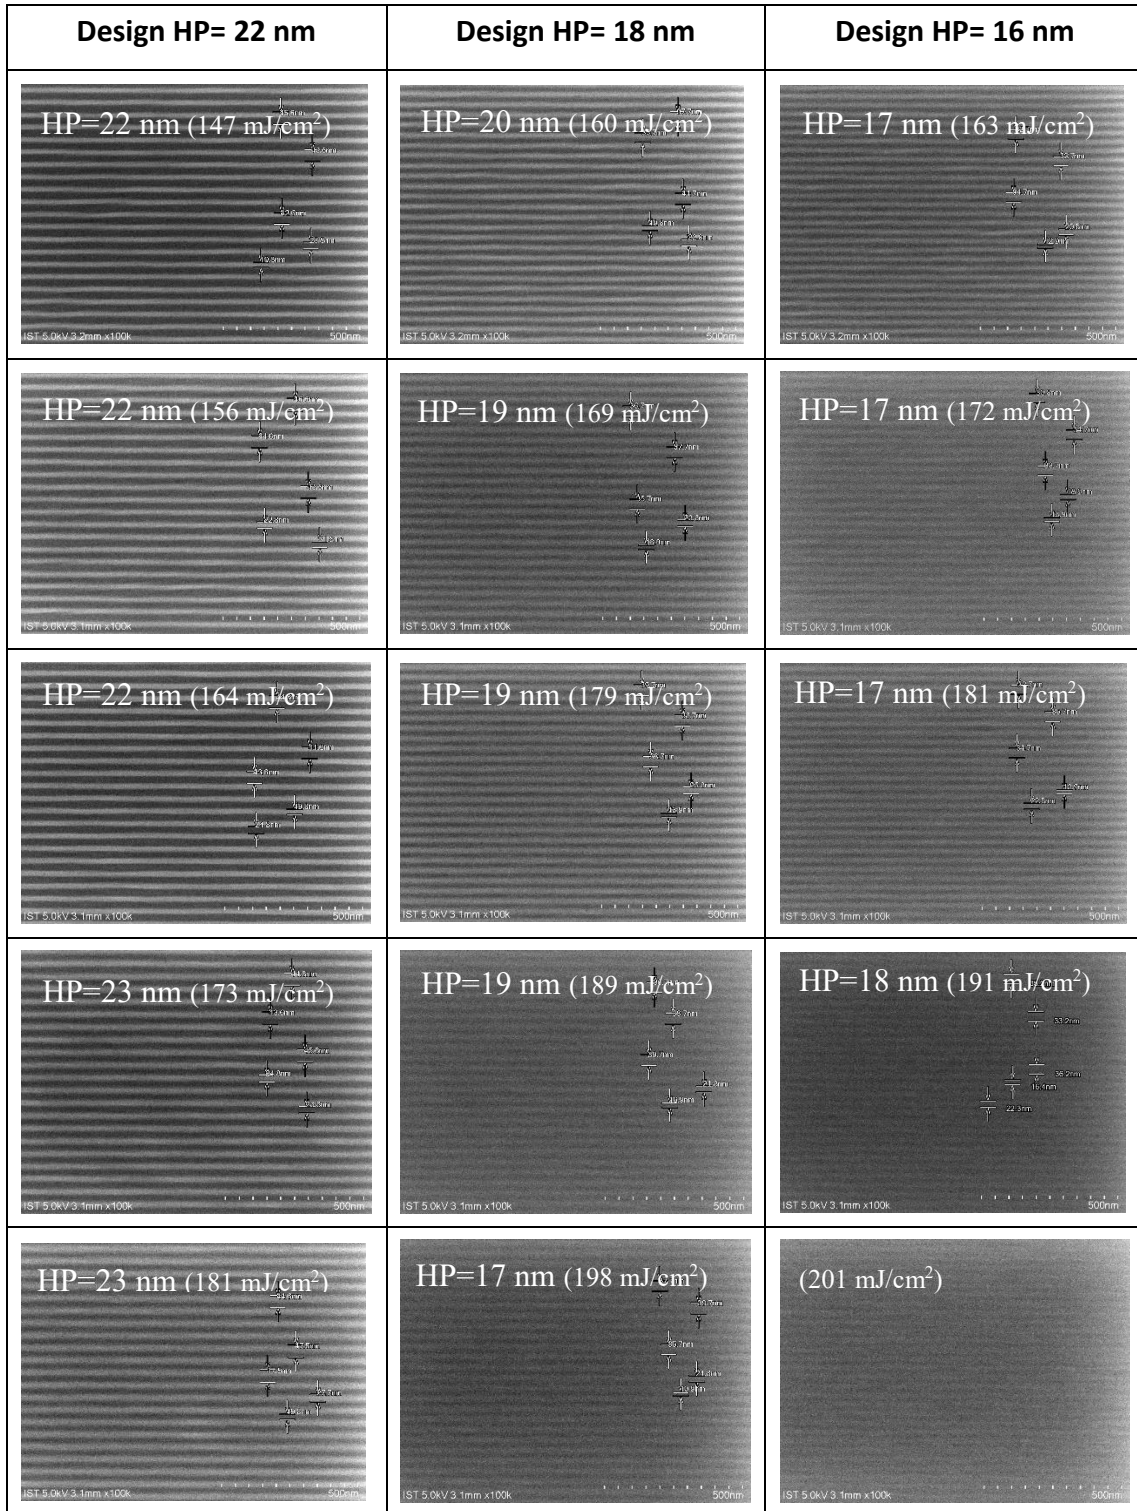

**Figure S14.** SEM images of EUV lithography patterns on 1-(OH) HP= 22, 18,16 nm at different dose. Process parameter: 2.0 wt%, THK= 23 nm, Developer: 2-Heptanone : Hexane = 1 : 1 80 s, PEB= 80°C 60 s

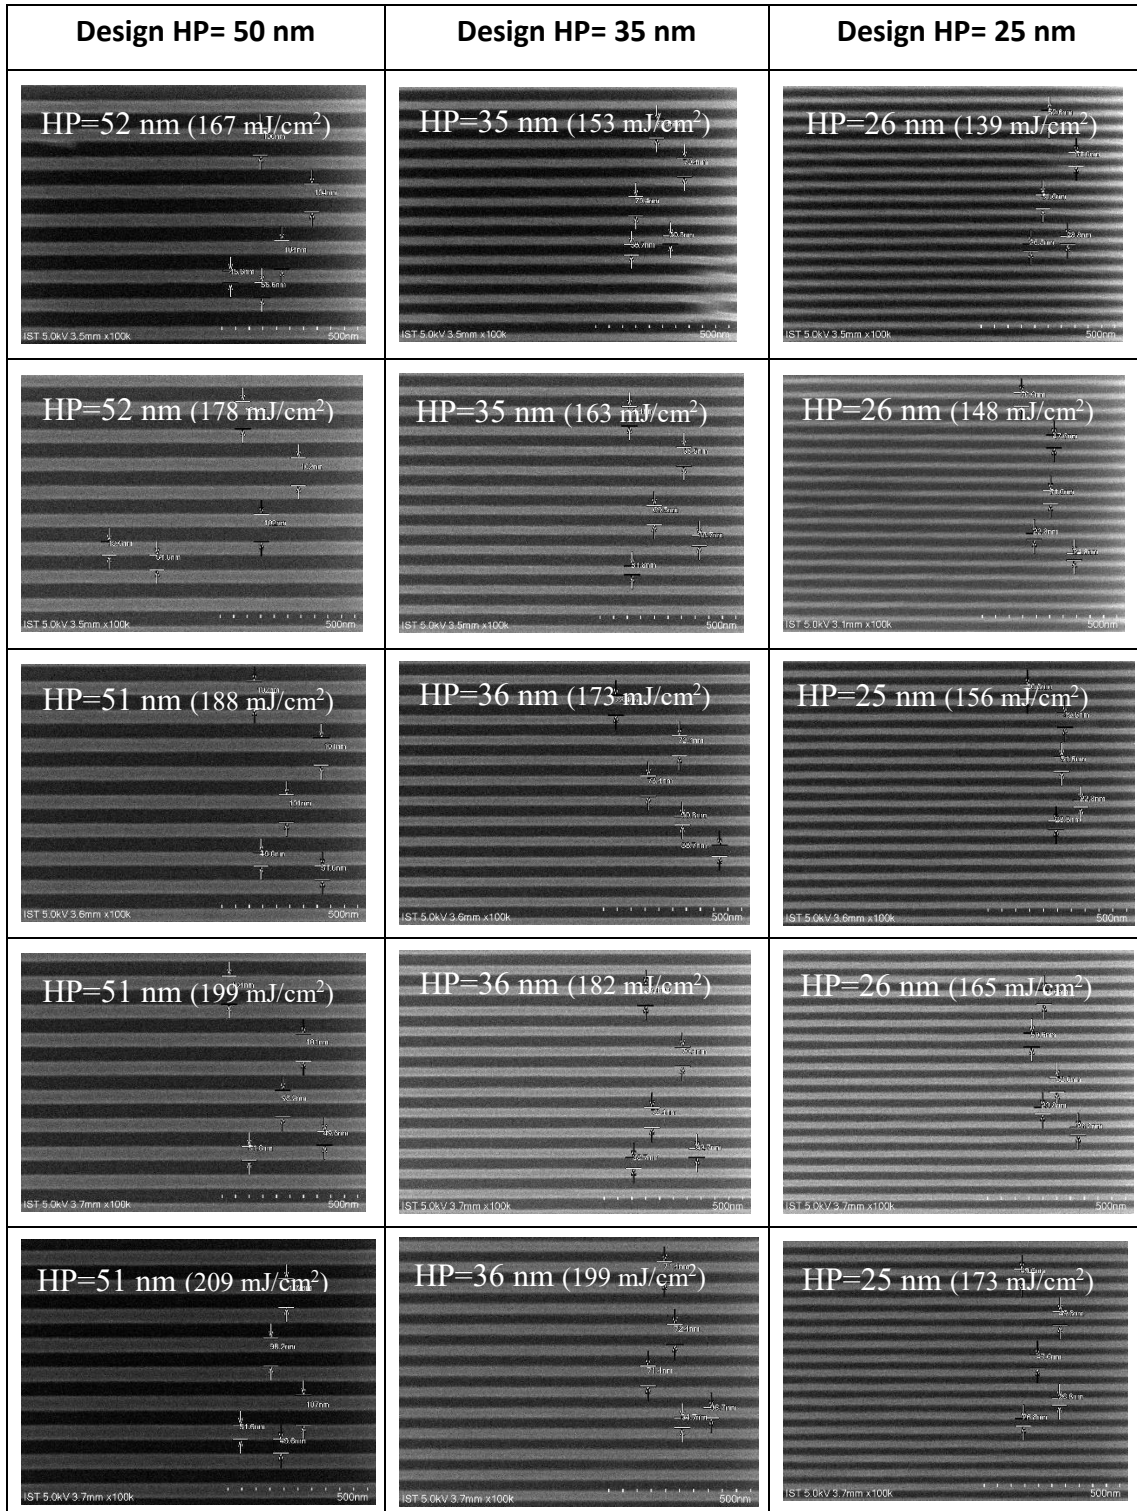

**Figure S15.** SEM images of EUV lithography patterns on **2-(OH)** HP= 50, 35, 25 nm at different dose. Process parameter: 2.0 wt%, THK= 24 nm, Developer: 2-Heptanone : Hexane = 1 : 1 60 s, PEB= 80°C 60 s.



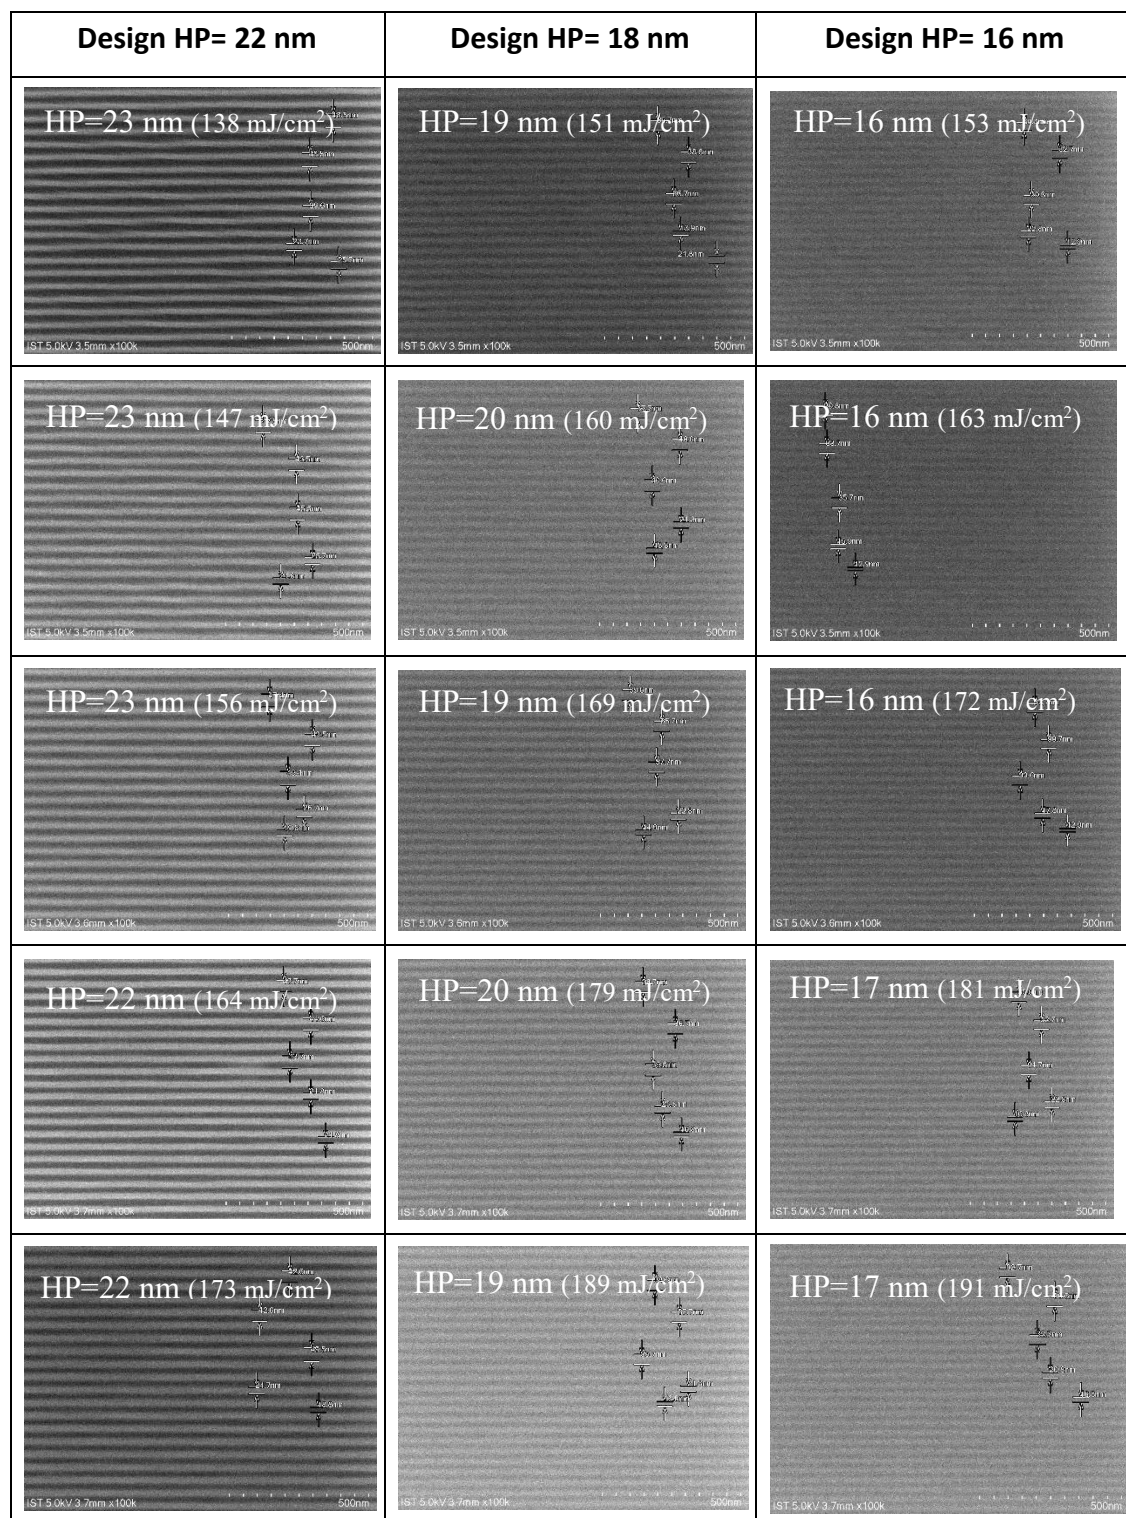

**Figure S16.** SEM images of EUV lithography patterns on 2-(OH) HP= 22, 18, 16 nm at different dose. Process parameter: 2.0 wt%, THK= 24 nm, Developer: 2-Heptanone : Hexane = 1 : 1 60 s, PEB= 80°C 60 s.

## 5. X-ray crystallographic structures and data.

### 5.1 X-ray structure of isobutyrate derivative 1':

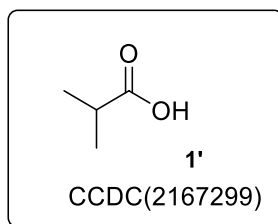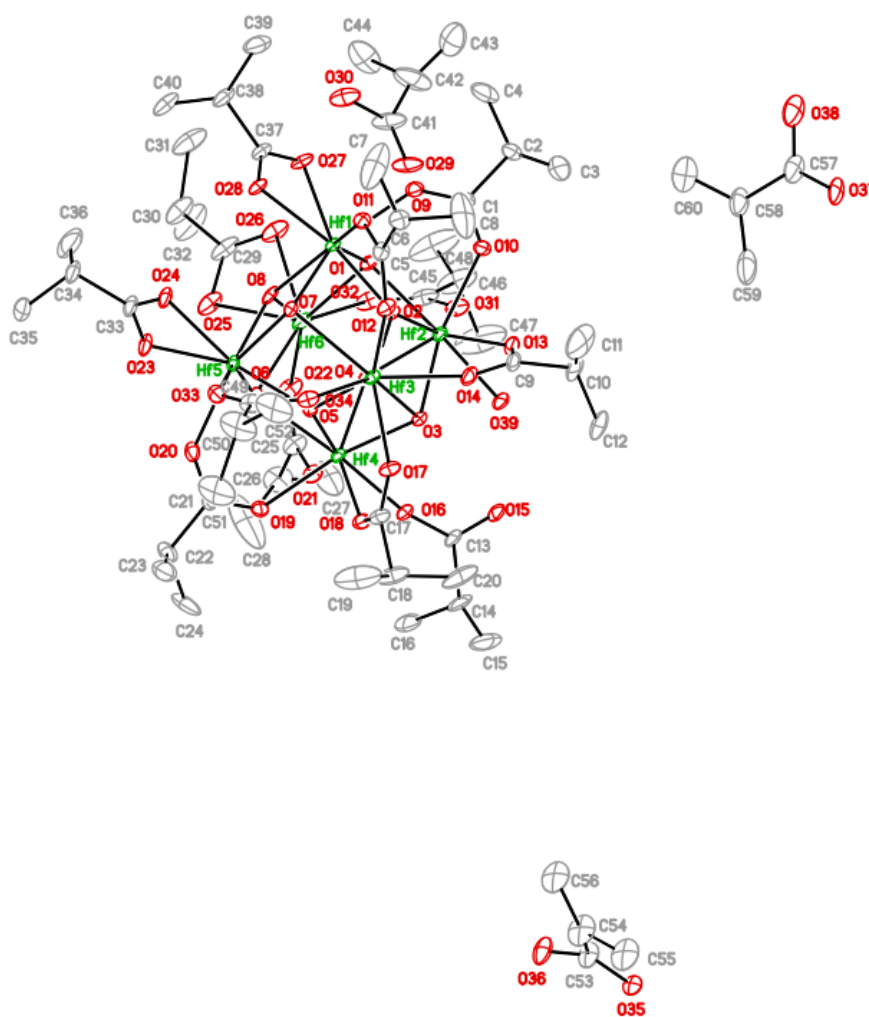

Table S1. Crystal data and structure refinement for mo\_200723lt\_0m\_a.

|                     |                  |
|---------------------|------------------|
| Identification code | mo_200723LT_0m_a |
| Empirical formula   | C60 H108 Hf6 O39 |
| Formula weight      | 2524.40          |
| Temperature         | 100(2) K         |
| Wavelength          | 0.71073 Å        |
| Crystal system      | Triclinic        |

|                                   |                                             |                |
|-----------------------------------|---------------------------------------------|----------------|
| Space group                       | P-1                                         |                |
| Unit cell dimensions              | a = 13.6866(9) Å                            | = 90.858(2)°.  |
|                                   | b = 14.8851(9) Å                            | = 97.847(2)°.  |
|                                   | c = 22.7136(14) Å                           | = 104.937(2)°. |
| Volume                            | 4423.0(5) Å <sup>3</sup>                    |                |
| Z                                 | 2                                           |                |
| Density (calculated)              | 1.895 Mg/m <sup>3</sup>                     |                |
| Absorption coefficient            | 7.091 mm <sup>-1</sup>                      |                |
| F(000)                            | 2424                                        |                |
| Crystal size                      | 0.15 x 0.15 x 0.14 mm <sup>3</sup>          |                |
| Theta range for data collection   | 0.906 to 26.526°.                           |                |
| Index ranges                      | -16<=h<=17, -18<=k<=18, -28<=l<=28          |                |
| Reflections collected             | 153604                                      |                |
| Independent reflections           | 18291 [R(int) = 0.0520]                     |                |
| Completeness to theta = 25.242°   | 100.0 %                                     |                |
| Absorption correction             | Semi-empirical from equivalents             |                |
| Max. and min. transmission        | 0.7454 and 0.6769                           |                |
| Refinement method                 | Full-matrix least-squares on F <sup>2</sup> |                |
| Data / restraints / parameters    | 18291 / 137 / 1036                          |                |
| Goodness-of-fit on F <sup>2</sup> | 1.090                                       |                |
| Final R indices [I>2sigma(I)]     | R1 = 0.0563, wR2 = 0.1338                   |                |
| R indices (all data)              | R1 = 0.0978, wR2 = 0.1739                   |                |
| Extinction coefficient            | n/a                                         |                |
| Largest diff. peak and hole       | 4.917 and -3.842 e.Å <sup>-3</sup>          |                |

## 6. Spectral data of key compounds.

### 6.1 Spectral data for partially decarboxylated 6-Hafnium Cluster with 2-methylbutanoic acid ligand 1-(OH).

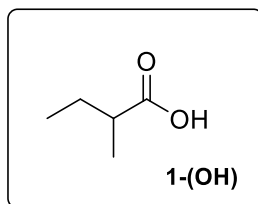

White solid (34%);  $^1\text{H}$  NMR (400 MHz,  $\text{CDCl}_3$ ):  $\delta$  2.13 (s, 10H), 1.66 ~ 1.33 (m, 20H), 1.03 (s, 30H), 0.85 (s, 30H);  $^{13}\text{C}$  NMR (125 MHz,  $\text{CDCl}_3$ ):  $\delta$  182.4, 42.8, 42.2, 26.6, 16.1, 11.9; EA Anal. Calcd. for  $\text{C}_{50}\text{H}_{96}\text{O}_{30}\text{Hf}_6$ : C: 26.71%; H: 4.30%, found: C: 26.50%; H: 4.36%.

### 6.2 Spectral data for 6-Hafnium Cluster with 2-methylbutanoic acid and isobutyric acid ligand 2.

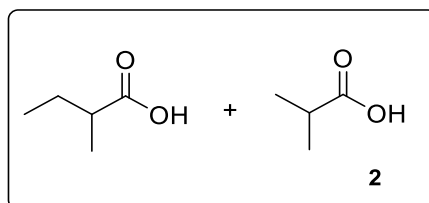

White solid (90%);  $^1\text{H}$  NMR (400 MHz,  $\text{CDCl}_3$ ):  $\delta$  5.22 (s, 2H), 2.40 (s, 6H), 2.22-2.12 (m, 9H), 1.65-1.40 (m, 18H), 1.05 (s, 63H), 0.87 (s, 27H);  $^{13}\text{C}$  NMR (125 MHz,  $\text{CDCl}_3$ ):  $\delta$  182.4, 42.8, 35.9, 26.6, 18.9, 16.1, 11.8; HRMS (ESI+,  $m/z$ ) Calcd. for  $\text{C}_{54}\text{H}_{103}\text{O}_{33}^{180}\text{Hf}_6$   $[\text{M}+\text{H}]^+$ : 2359.32, found: 2359.27; EA Anal. Calcd. for  $\text{C}_{69}\text{H}_{132}\text{O}_{39}\text{Hf}_6$ : C: 31.19%, H: 5.01%, found: C: 30.86%, H: 4.86%.

### 6.3 Spectral data for partially decarboxylated 6-Hafnium Cluster with 2-methylbutanoic acid and isobutyric acid ligand 2-(OH).

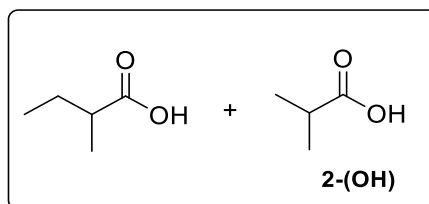

White solid (30%);  $^1\text{H}$  NMR (400 MHz,  $\text{CDCl}_3$ ):  $\delta$  2.15 (s, 4H), 2.07 (s, 6H), 1.64-1.24 (m, 12H), 1.05 (s, 42H), 0.85 (s, 18H);  $^{13}\text{C}$  NMR (125 MHz,  $\text{CDCl}_3$ ):  $\delta$  182.4, 42.8, 36.0, 35.5, 26.6, 19.0, 16.2, 11.9. EA Anal. Calcd. for  $\text{C}_{46}\text{H}_{88}\text{O}_{30}\text{Hf}_6$ : C: 25.20%, H: 4.05%, found: C: 25.17%, H: 4.36%.



**6.4 Spectral data for partially decarboxylated 12-Zirconium Cluster with 2-methylbutanoic acid ligand Zr-1-OH.**

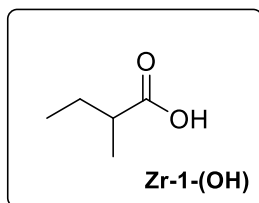

White solid;  $^1\text{H}$  NMR (400 MHz,  $\text{CDCl}_3$ ):  $\delta$ 2.13(s, 18H), 1.63(s, 18H), 1.32(s, 18H), 1.02,(d,  $J = 5.6$  Hz, 54H), 0.84(s, 54H);  $^{13}\text{C}$  NMR (100 MHz,  $\text{CDCl}_3$ ):  $\delta$ 182.6, 42.6, 26.7, 16.2, 12.0.; HRMS(ESI,  $m/z$ ) Calcd. for  $\text{C}_{90}\text{H}_{177}\text{O}_{58}\text{Zr}_{12}$   $[\text{M}+\text{H}]^+$  : 3264.95, found: 3264.92; EA Calc. for  $\text{C}_{90}\text{H}_{177}\text{O}_{58}\text{Zr}_{12}$ : C: 32.95%, H: 5.41%, found: C: 33.64%, H: 5.62%.

# 7. <sup>1</sup>H and <sup>13</sup>C NMR of key compounds

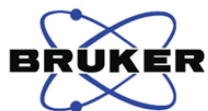

7.240

5.091

2.210  
2.100  
1.668  
1.650  
1.634  
1.617  
1.599  
1.396  
1.286  
1.044  
0.856

Current Data Parameters  
 NAME PC225 HF  
 EXPNO 1  
 PROCNO 1

F2 - Acquisition Parameters  
 Date\_ 20220228  
 Time 11.40  
 INSTRUM spect  
 PROBHD 5 mm DUL 13C-1  
 PULPROG zg30  
 TD 32768  
 SOLVENT CDCl3  
 NS 10  
 DS 0  
 SWH 6410.256 Hz  
 FIDRES 0.195625 Hz  
 AQ 2.5559039 sec  
 RG 4  
 DW 78.000 usec  
 DE 6.00 usec  
 TE 300.0 K  
 D1 2.00000000 sec  
 TD0 1

===== CHANNEL f1 =====  
 NUC1 1H  
 P1 10.00 usec  
 PL1 -2.40 dB  
 SFO1 400.1528010 MHz

F2 - Processing parameters  
 SI 16384  
 SF 400.1500170 MHz  
 WDW EM  
 SSB 0  
 LB 0 Hz  
 GB 0  
 PC 1.00

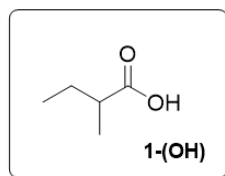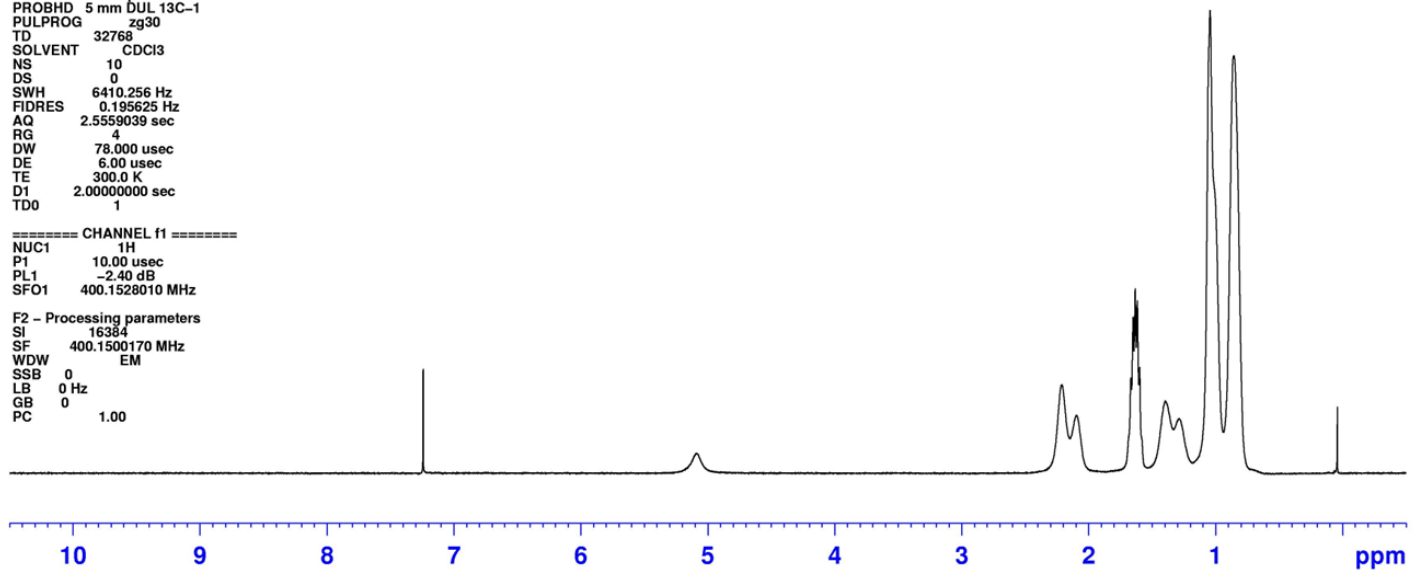

2.92  
15.28  
30.29  
45.43  
45.06

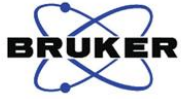

182.37

77.25  
77.00  
76.74

42.81

26.57

16.11

11.85

Current Data Parameters  
NAME liou210702.001  
EXPNO 2  
PROCNO 1

F2 - Acquisition Parameters  
Date\_ 20210704  
Time 8.51 h  
INSTRUM spect  
PROBHD Z119470\_0234 (  
PULPROG zgpg30

SOLVENT CDCl3  
NS 4096  
DS 0  
SWH 29761.904 Hz  
FIDRES 0.938261 Hz  
AQ 0.5505024 sec  
RG 191.01  
DW 16.800 usec  
DE 6.50 usec  
TE 300.8 K  
D1 2.00000000 sec  
D11 0.03000000 sec  
TD0 1  
SFO1 125.7785374 MHz  
NUC1 13C  
P1 10.00 usec  
PLW1 84.00000000 W  
SFO2 500.1620006 MHz  
NUC2 1H  
CPDPRG2 bi\_waltz65\_256  
PCPD2 80.00 usec  
PLW2 29.50000000 W  
PLW12 0.46094000 W  
PLW13 0.23148000 W

F2 - Processing parameters  
SI 32768  
SF 125.7653330 MHz  
WDW EM  
SSB 0  
LB 3.00 Hz  
GB 0  
PC 1.00

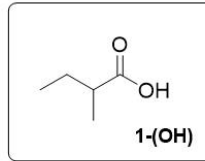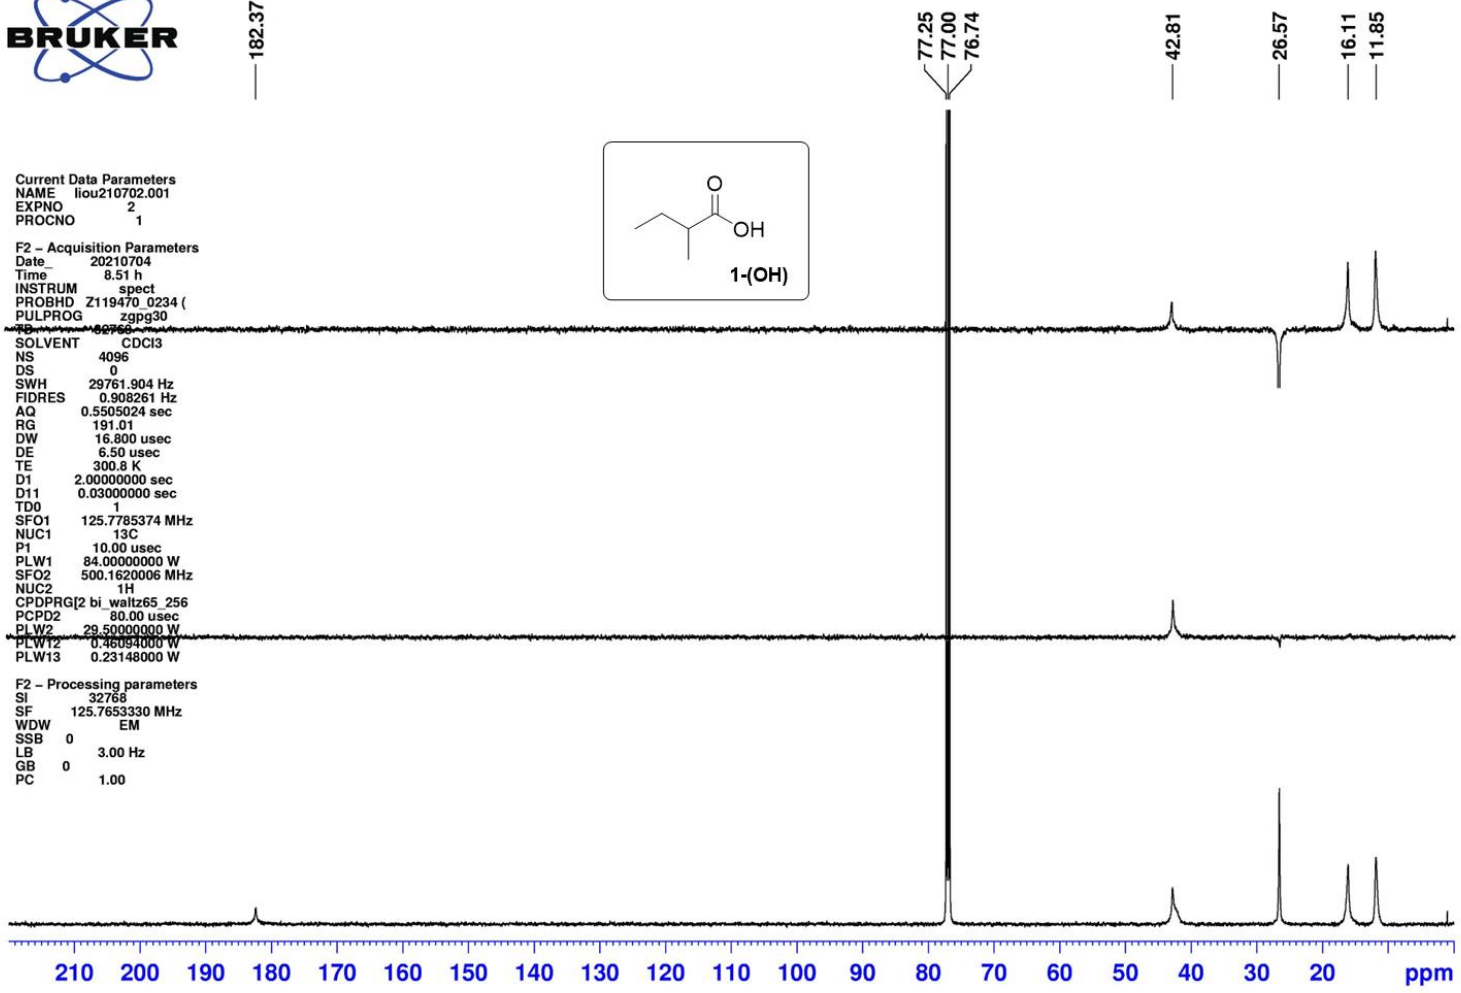

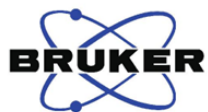

— 7.240

— 5.223

2.397  
2.218  
2.120  
1.646  
1.629  
1.613  
1.596  
1.399  
1.312  
1.046  
0.865

Current Data Parameters  
NAME PC089 H{(OR)4 M-butric isop  
EXPNO 1  
PROCNO 1

F2 - Acquisition Parameters  
Date\_ 20210702  
Time 15.32  
INSTRUM spect  
PROBHD 5 mm DUL 13C-1  
PULPROG zg30  
TD 32768  
SOLVENT CDCl3  
NS 26  
DS 0  
SWH 6410.256 Hz  
FIDRES 0.195625 Hz  
AQ 2.5559039 sec  
RG 203  
DW 78.000 usec  
DE 6.00 usec  
TE 300.0 K  
D1 2.00000000 sec  
TD0 1

===== CHANNEL f1 =====  
NUC1 1H  
P1 10.00 usec  
PL1 -2.40 dB  
SFO1 400.1528010 MHz

F2 - Processing parameters  
SI 16384  
SF 400.1500172 MHz  
WDW EM  
SSB 0  
LB 0 Hz  
GB 0  
PC 1.00

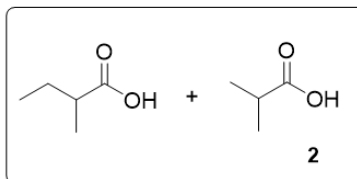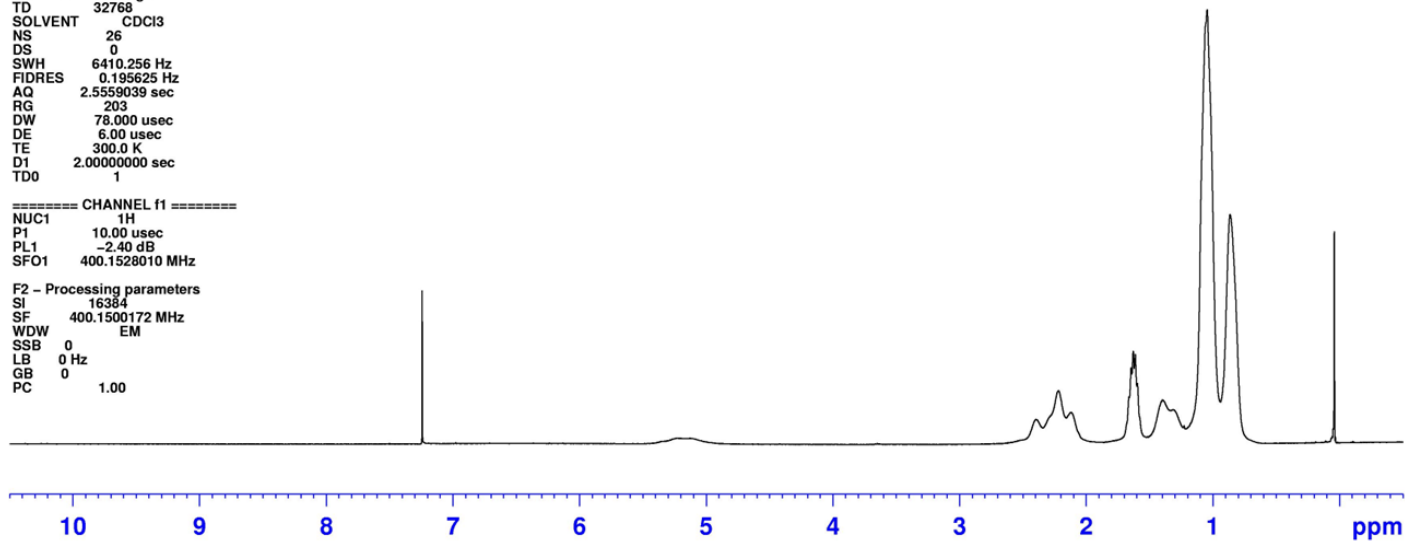

1.63

6.00  
8.89  
9.15  
9.19  
62.91  
27.04

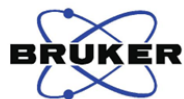

182.41

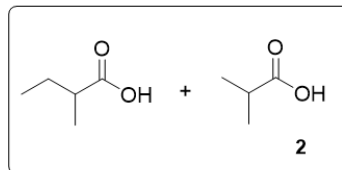

77.25  
77.00  
76.74

42.80

35.93

26.62

18.98

16.13

11.80

Current Data Parameters  
NAME liou210705.003  
EXPNO 2  
PROCNO 1

F2 - Acquisition Parameters

Date\_ 20210709  
Time 7.17 h

INSTRUM spect

PULPROG zgpg30

TD 32768

SOLVENT CDCl3

NS 4096

DS 0

SWH 29761.904 Hz

FIDRES 0.908261 Hz

AO 0.5505024 sec

RG 191.01

DW 16.800 usec

DE 6.50 usec

TE 300.7 K

D1 2.00000000 sec

D11 0.03000000 sec

TD0 1

SFO1 125.7785374 MHz

NUC1 13C

P1 10.00 usec

PLW1 84.00000000 W

SFO2 500.1620006 MHz

NUC2 1H

CPDPRG2 bi\_waltz65\_256

PCPD2 80.00 usec

PLW2 25.50000000 W

PLW12 0.46094000 W

PLW13 0.23148000 W

F2 - Processing parameters

SI 32768

SF 125.7653330 MHz

WDW EM

SSB 0

LB 3.00 Hz

GB 0

PC 1.00

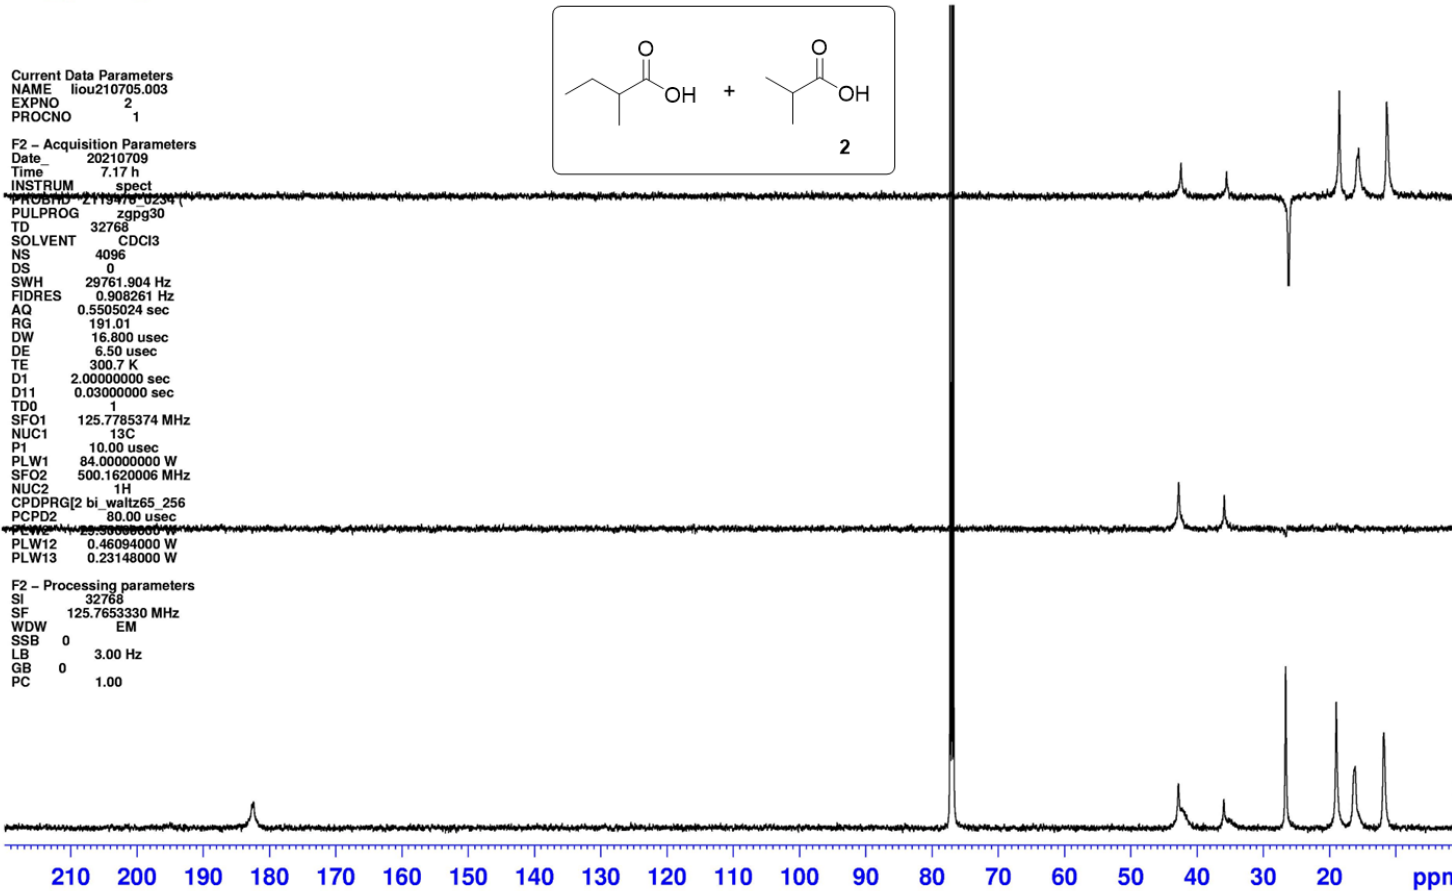

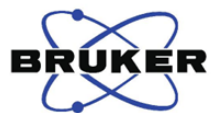

7.240

2.149  
2.066  
1.641  
1.397  
1.342  
1.230  
1.050  
0.854

Current Data Parameters  
NAME PC089 LIOH 0823-1  
EXPNO 2  
PROCNO 1

F2 - Acquisition Parameters  
Date\_ 20210830  
Time 16.12  
INSTRUM spect  
PROBHD 5 mm DUL 13C-1  
PULPROG zg30  
TD 32768  
SOLVENT CDCl3  
NS 20  
DS 0  
SWH 6410.256 Hz  
FIDRES 0.195625 Hz  
AQ 2.5559039 sec  
RG 161  
DW 78.000 usec  
DE 6.00 usec  
TE 300.0 K  
D1 2.0000000 sec  
TD0 1

===== CHANNEL f1 =====  
NUC1 1H  
P1 10.00 usec  
PL1 -2.40 dB  
SFO1 400.1528010 MHz

F2 - Processing parameters  
SI 16384  
SF 400.1500172 MHz  
WDW EM  
SSB 0  
LB 0 Hz  
GB 0  
PC 1.00

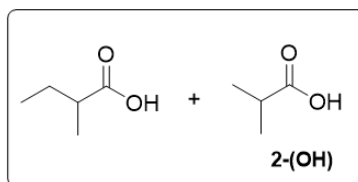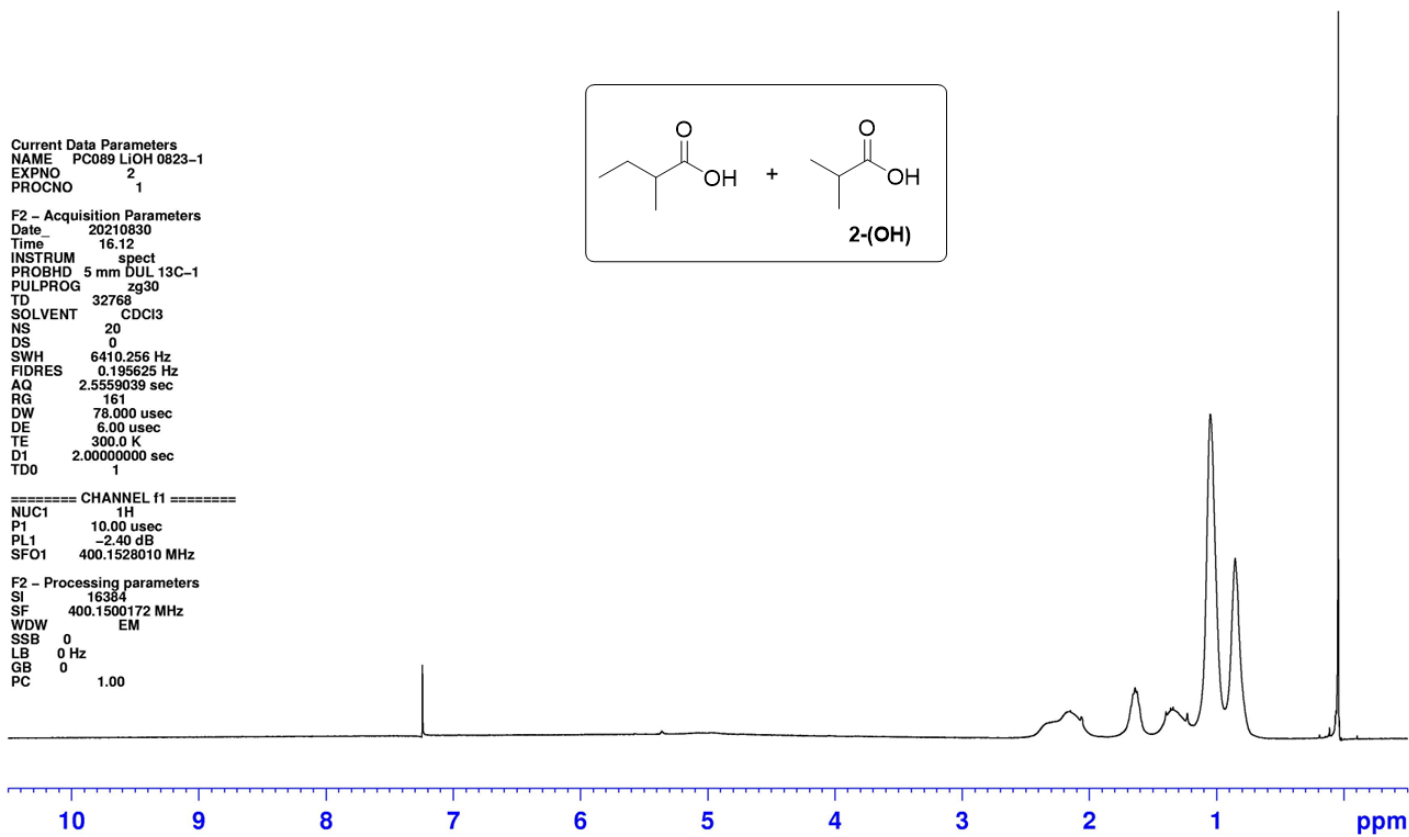

4.00  
6.06  
6.01  
6.04  
42.06  
18.44

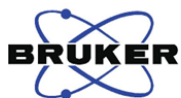

182.39

77.25  
77.00  
76.75

42.78  
42.21  
35.97  
35.52

26.61

19.03  
16.18  
11.87

PC 089-LIOH 0823-1

Current Data Parameters  
NAME liou210905.001  
EXPNO 2  
PROCNO 1

F2 - Acquisition Parameters

Date\_ 20210906  
Time 13.16 h  
INSTRUM spect  
PROBHD Z119471\_0234 /  
PULPROG zgpg30  
TD 32768  
SOLVENT CDCl3  
NS 2122  
DS 0  
SWH 29761.904 Hz  
FIDRES 0.908261 Hz  
AQ 0.5505024 sec  
RG 191.01  
DW 16.800 usec  
DE 6.50 usec  
TE 301.2 K  
D1 2.0000000 sec  
D11 0.0300000 sec  
TD0 1  
SFO1 125.7785374 MHz  
NUC1 13C  
P1 10.00 usec  
PLW1 84.0000000 W  
SFO2 500.1620006 MHz  
NUC2 1H  
CPDPRG2 bi\_waltz65\_256  
PCP02 00.00 usec  
PLW2 29.5000000 W  
PLW12 0.46094000 W  
PLW13 0.23148000 W

F2 - Processing parameters  
SF 125.7653331 MHz  
WDW EM  
SSB 0  
LB 3.00 Hz  
GB 0  
PC 1.00

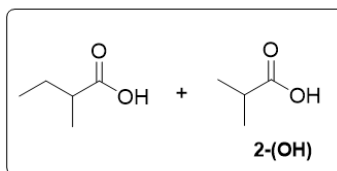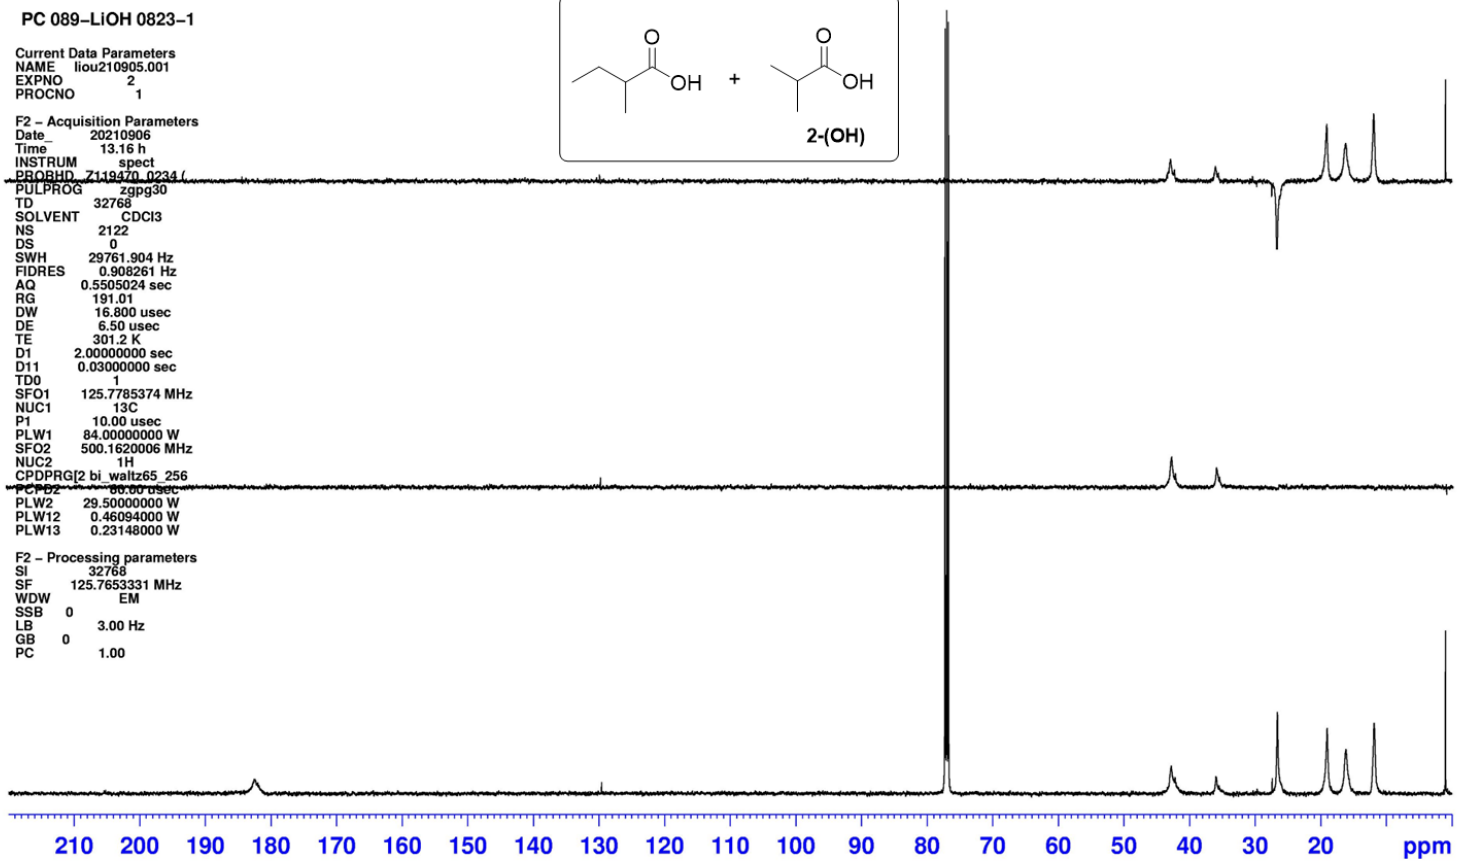

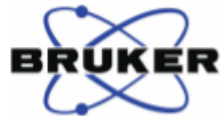

150

Current Data Parameters  
NAME 20210125  
EXPNO 1  
PROCNO 1

F2 - Acquisition Parameters  
Date\_ 20210125  
Time 20.53  
INSTRUM spect  
PROBHD 5 mm DUL 13C-1  
PULPROG zg30  
TD 32768  
SOLVENT CDCl3  
NS 8  
DS 0  
SWH 6410.256 Hz  
FIDRES 0.195625 Hz  
AQ 2.5559039 sec  
RG 128  
DW 78.000 usec  
DE 6.000 usec  
TE 300.0 K  
D1 2.00000000 sec  
TD0 1

===== CHANNEL f1 =====  
NUC1 1H  
P1 10.00 usec  
PL1 -2.40 dB  
SFO1 400.1528010 MHz

F2 - Processing parameters  
SI 16384  
SF 400.1500172 MHz  
WDW EM  
SSB 0  
LB 0 Hz  
GB 0  
PC 1.00

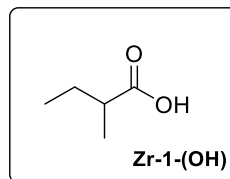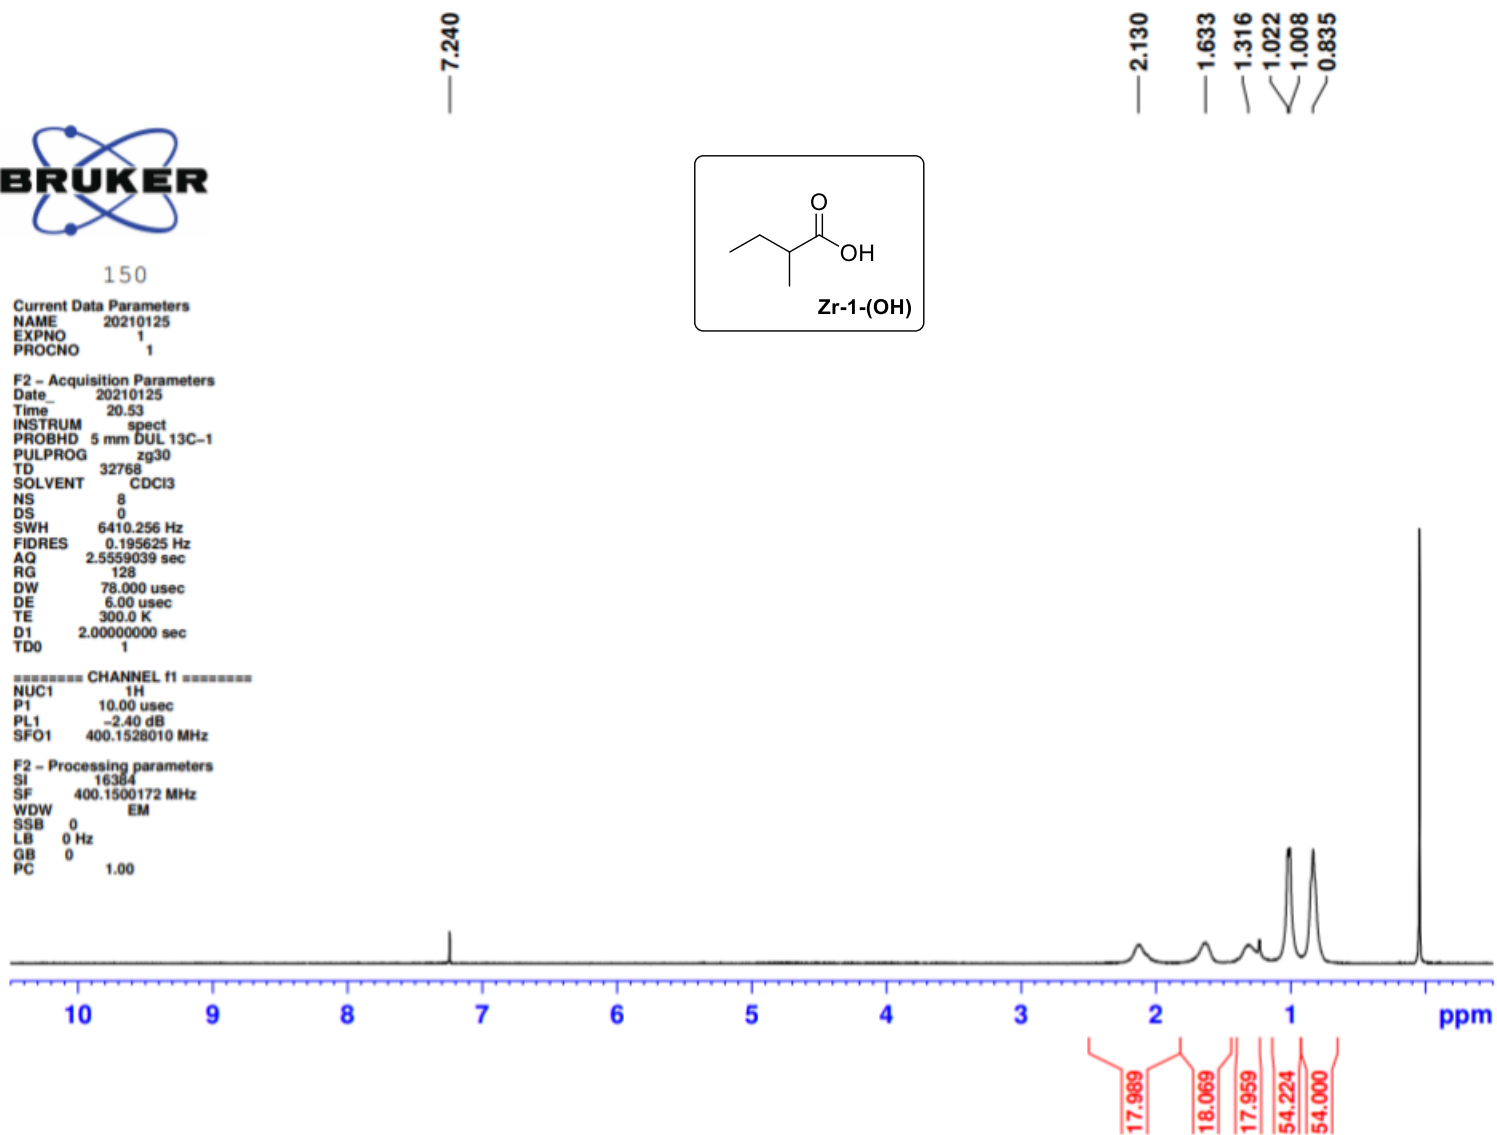



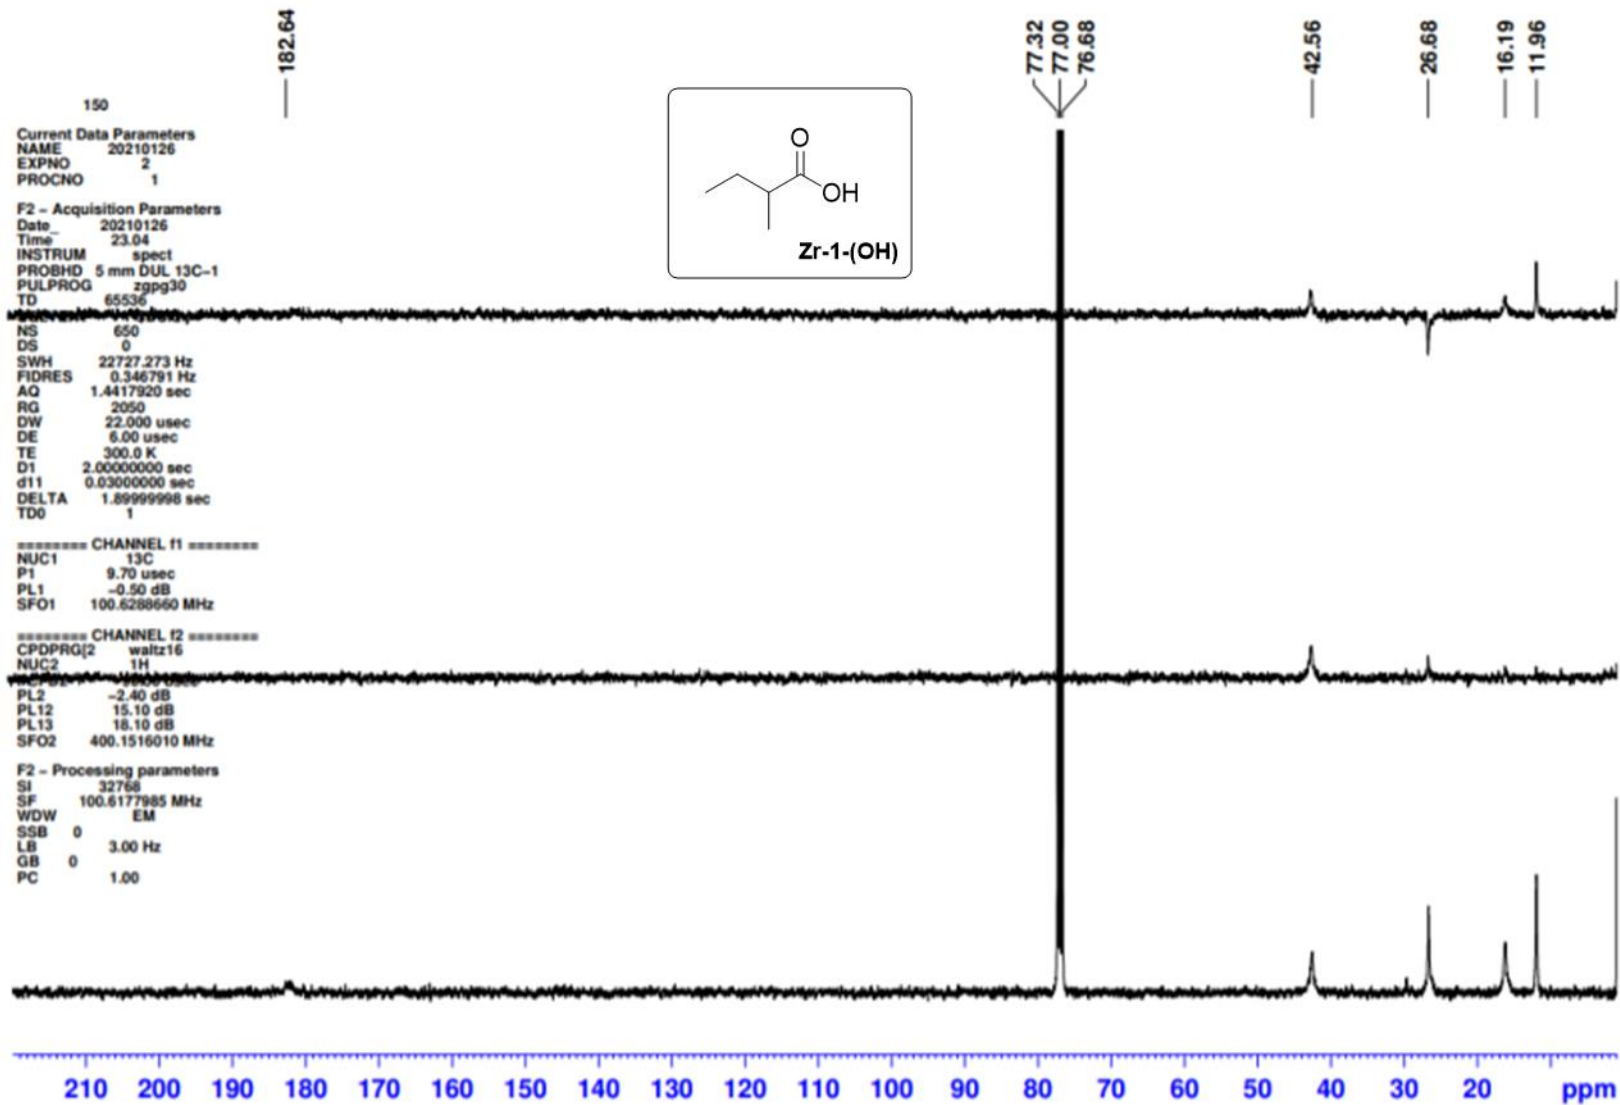

Supplement: d2tc02912j1.pdf [file d2tc02912j1.pdf]
